# Supplementary material for: Determinants of Honey and Other Bee Products Use for Culinary, Cosmetic, and Medical Purposes
Source: MDPI journal article supplement (doi:10.3390/nu15030737), 2023-02-01
Supplement: s1 [file s1]

Table S1. Statistical significance analysis of the variation in the frequency of use of honey for consumption, cosmetic and medicinal purposes (Chi<sup>2</sup> test).

|                                     | Consumption<br>purposes | Cosmetic<br>purposes | Therapeutic<br>purposes | Total | P                 |
|-------------------------------------|-------------------------|----------------------|-------------------------|-------|-------------------|
| <b>never</b>                        | 4                       | 248                  | 92                      | 344   | <b>p&lt;.0001</b> |
| %col                                | 0,92%                   | 57,14%               | 21,20%                  |       |                   |
| %row                                | 1,16%                   | 72,09%               | 26,74%                  |       |                   |
| <b>several times a year or less</b> | 81                      | 117                  | 208                     | 406   |                   |
| %col                                | 18,66%                  | 26,96%               | 47,93%                  |       |                   |
| %row                                | 19,95%                  | 28,82%               | 51,23%                  |       |                   |
| <b>once a month on average</b>      | 92                      | 35                   | 53                      | 180   |                   |
| %col                                | 21,20%                  | 8,06%                | 12,21%                  |       |                   |
| %row                                | 51,11%                  | 19,44%               | 29,44%                  |       |                   |
| <b>once a week on average</b>       | 86                      | 26                   | 42                      | 154   |                   |
| %col                                | 19,82%                  | 5,99%                | 9,68%                   |       |                   |
| %row                                | 55,84%                  | 16,88%               | 27,27%                  |       |                   |
| <b>several times a week</b>         | 83                      | 7                    | 20                      | 110   |                   |
| %col                                | 19,12%                  | 1,61%                | 4,61%                   |       |                   |
| %row                                | 75,45%                  | 6,36%                | 18,18%                  |       |                   |
| <b>daily or almost daily</b>        | 88                      | 1                    | 19                      | 108   |                   |
| %col                                | 20,28%                  | 0,23%                | 4,38%                   |       |                   |
| %row                                | 81,48%                  | 0,93%                | 17,59%                  |       |                   |

Table S2. Statistical significance analysis of the variation in the use of bee products other than honey for cosmetic and medicinal purposes (Chi<sup>2</sup> test).

|                    | Cosmetic<br>purposes | Therapeutic<br>purposes | Total |                   |
|--------------------|----------------------|-------------------------|-------|-------------------|
| <b>Royal jelly</b> | 49                   | 19                      | 68    | <b>p&lt;.0001</b> |
| %col               | 28,82%               | 9,05%                   |       |                   |
| %row               | 72,06%               | 27,94%                  |       |                   |
| <b>Bee pollen</b>  | 18                   | 56                      | 74    |                   |
| %col               | 10,59%               | 26,67%                  |       |                   |
| %row               | 24,32%               | 75,68%                  |       |                   |
| <b>Propolis</b>    | 36                   | 108                     | 144   |                   |
| %col               | 21,18%               | 51,43%                  |       |                   |
| %row               | 25,00%               | 75,00%                  |       |                   |
| <b>Beeswax</b>     | 67                   | 27                      | 94    |                   |
| %col               | 39,41%               | 12,86%                  |       |                   |
| %row               | 71,28%               | 28,72%                  |       |                   |
